# Supplementary material for: Combining Pickering Emulsion Polymerization with Molecular Imprinting to Prepare Polymer Microspheres for Selective Solid-Phase Extraction of Malachite Green
Source: PubMed Central journal article supplement (PMC6418669; doi:10.3390/polym9080344), 2017-08-06
Supplement: polymers-09-00344-s001.pdf [file polymers-09-00344-s001.pdf]

for

# Combining Pickering emulsion polymerization with molecular imprinting to prepare polymer microspheres for selective solid-phase extraction of malachite green

Weixin Liang<sup>1,2,†</sup>, Huawen Hu<sup>1,†</sup>, Pengran Guo<sup>2</sup>, Yanfang Ma<sup>2,\*</sup>, Peiyong Li<sup>1</sup>, Wenrou Zheng<sup>1</sup>, Min Zhang<sup>1,\*</sup>

<sup>1</sup> College of Materials Science and Energy Engineering, Foshan University, Foshan, Guangdong 528000, China

<sup>2</sup> Guangdong Provincial Public Laboratory of Analysis and Testing Technology, China National Analytical Center (Guangzhou), Guangzhou 510070, China

\* Correspondence: myfedwin@126.com (Y.M.); zhangmin@gic.ac.cn (M.Z.)

† These authors contributed equally to this work.

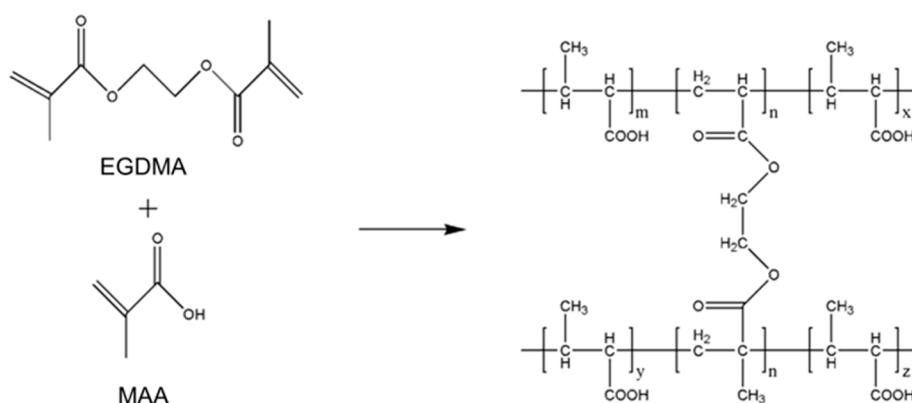

**Figure S1** Molecular structures for showing the synthesis of polymer microspheres via free-radical polymerization and crosslinking reactions.

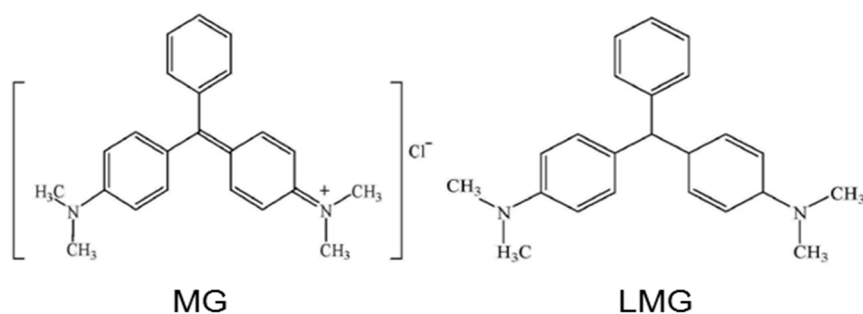

**Figure S2** Molecular structures of MG and Leuco-MG (LMG).

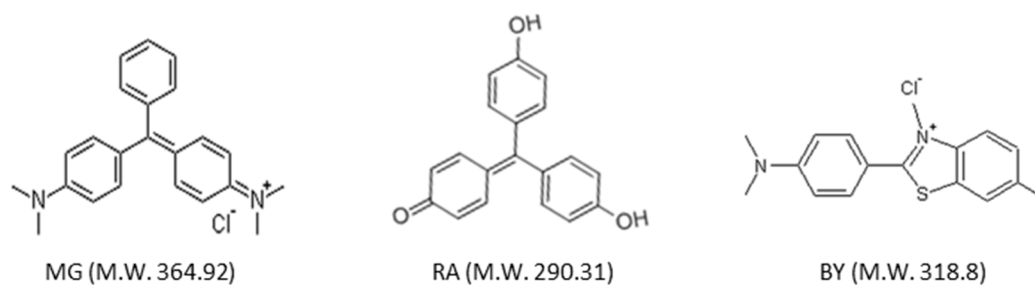

**Figure S3** Molecular structures of MG, RA and BY, together with the corresponding molecular weight as given in the bottom row.

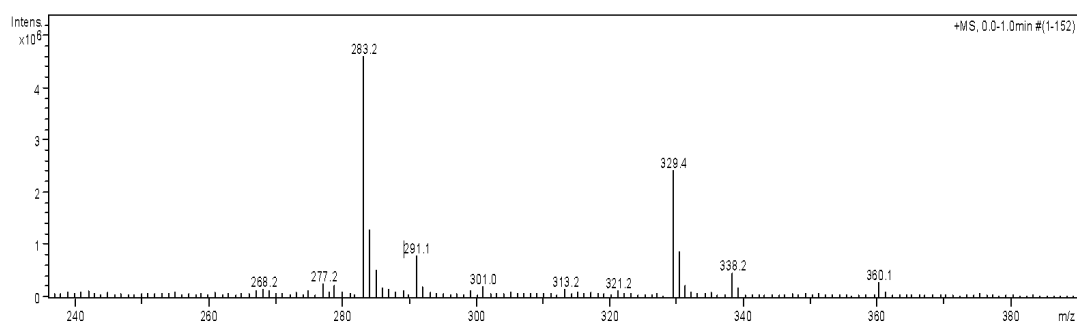

**Figure S4** Mass spectra of MG, RA and BF.

In the ESI<sup>+</sup> ionization mode, the ion peaks at  $m/z$ 291.1,  $m/z$ 329.4 and  $m/z$ 283.2 can be indexed to RA, MG (lack of a Cl<sup>-</sup> ion) and BY (lack of a Cl<sup>-</sup> ion), respectively.

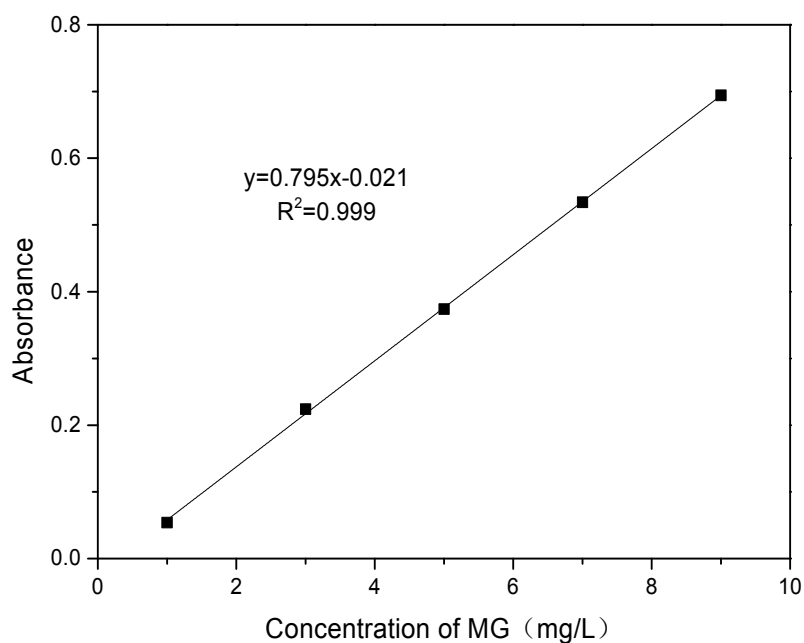

**Figure S5** Standard curve of MG.

The MG concentration can be detected on a spectrophotometer. Specifically, MG standard solutions with concentrations of 1, 3, 5, 7, and 9 mg/L are measured, using DI water as the reference. The absorbance at 618 nm is monitored for obtaining the standard curve of MG.

**Table S1** The number of microspheres, with a specific range of size, as counted for obtaining the particle diameter distribution histogram as shown in Figure 2(g).

| Particle diameter ( $\mu\text{m}$ ) | Number of M-PMs | Number of PMs |
|-------------------------------------|-----------------|---------------|
| 30~50                               | 10              | --            |
| 50~70                               | 66              | --            |
| 70~90                               | 159             | --            |
| 90~110                              | 123             | 4             |
| 110~130                             | 30              | 9             |
| 130~150                             | 8               | 14            |
| 150~170                             | 2               | 14            |
| 170~190                             | 4               | 12            |
| 190~210                             | --              | 16            |
| 210~230                             | --              | 14            |
| 230~250                             | --              | 8             |

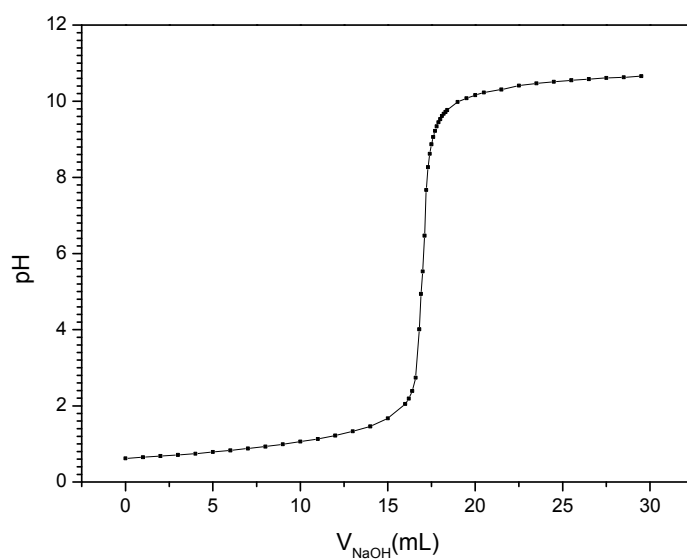

**Figure S6** Determination of pKa of M-PMs by the titration method, which is estimated to be 5.85.
